# Supplementary material
Source: PubMed Central journal article supplement (PMC2885181)
Supplement: supp_M110.124800_jbc.M110.124800-1.pdf [file supp_M110.124800_jbc.M110.124800-1.pdf]

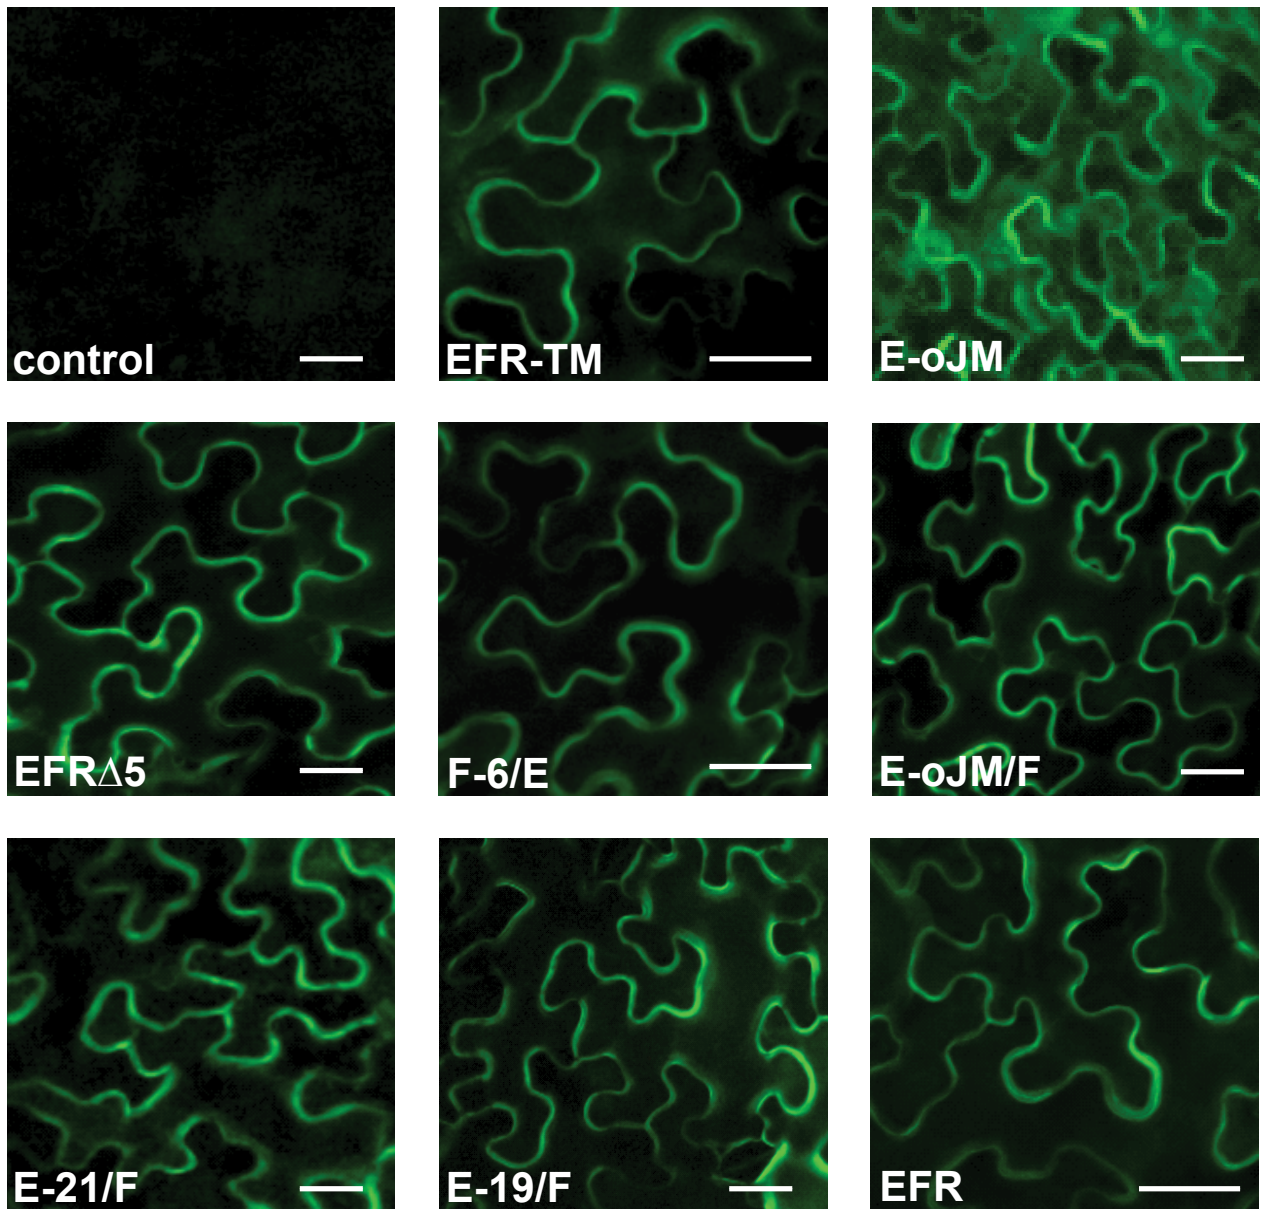

Suppl. Fig. 1. Expression of GFP-tagged EFR variants in *N. benthamiana* leaves. GFP-tagged EFR, EFR-variants and EFR-FLS2 chimeras were expressed in *N. benthamiana* leaves and expression was monitored after ~36-48 h with a fluorescence microscope. Pictures show typical epidermal cells from the lower surface of the leaf. Bar indicates 10  $\mu$ m.

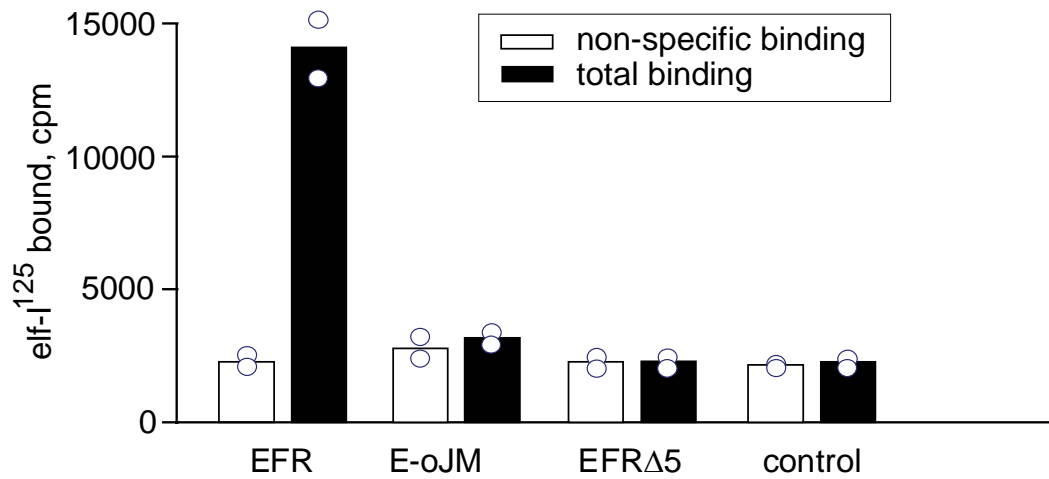

Suppl. Fig. 2. Binding of  $\text{elf-I}^{125}$  to binding sites adsorbed to ConA-beads. Leaves of *N. benthamiana* expressing intact or truncated forms of EFR were extracted by solubilization in 25 mM Tris pH 8.0, 150 mM NaCl, 1% (w/v) Nonidet NP40 and 0.5% (w/v) Deoxycholate. Glycoproteins were adsorbed to ConA-beads (Sigma). Binding of  $\text{elf-I}^{125}$  was determined in the absence (total binding) or presence (non-specific binding) of 1  $\mu\text{M}$  unlabeled elf18. Measurements were done in duplicate with bars indicating the mean of the two values.
